# Supplementary material
Source: PubMed Central journal article supplement (PMC4108498)
Supplement: NIHMS611308-supplement-01.pdf [file NIHMS611308-supplement-01.pdf]

# Supplemental Information

## Conformational Dynamics of *Thermus aquaticus* DNA Polymerase I during Catalysis\*

Cuiling Xu<sup>1,†</sup>, Brian A. Maxwell<sup>1,2,†</sup> and Zucui Suo<sup>1,2,\*</sup>

<sup>1</sup>Department of Chemistry and Biochemistry,

<sup>2</sup>Ohio State Biophysics Program, The Ohio State University, Columbus, OH 43210, USA

<sup>†</sup>These authors contributed equally to this work

- Tables S1 and S2
- Figures S1-S3

**Table S1.** The estimated distance (Å) between the donor Alexa488 labeling site on DNA and acceptor Alexa594 labeling site on the domains of Taq Pol<sup>1</sup>.

| Domains     | Residues <sup>2</sup> | Location  | Binary <sup>a</sup><br>(9 <sup>th</sup> bp <sup>d</sup> ) | Open<br>ternary <sup>b</sup> | Close<br>ternary <sup>c</sup> | Binary <sup>a</sup><br>(10 <sup>th</sup> bp <sup>e</sup> ) |
|-------------|-----------------------|-----------|-----------------------------------------------------------|------------------------------|-------------------------------|------------------------------------------------------------|
| N-Terminal  | V256C                 | Loop      | -                                                         | -                            | -                             | -                                                          |
| Intervening | K346C                 | Loop      | 37.8                                                      | 38.2                         | 38.1                          | 37.0                                                       |
|             | R411C                 | Helix     | 32.2                                                      | 32.1                         | 32.1                          | 32.9                                                       |
| Thumb       | E524C                 | Loop      | 41.0                                                      | 39.9                         | 39.7                          | 44.1                                                       |
|             | E465C                 | Helix     | 32.4                                                      | 31.9                         | 31.8                          | 32.7                                                       |
| Finger      | V649C                 | Loop      | 47.7                                                      | ----                         | 50.7                          | 51.4                                                       |
|             | S644C                 | Helix (N) | 54.3                                                      | 54.4                         | 47.3                          | 57.8                                                       |
| Palm        | A814C                 | Loop      | 49.7                                                      | 49.1                         | 49.0                          | 52.5                                                       |
|             | R801C                 | Helix     | 48.0                                                      | 47.2                         | 47.3                          | 49.1                                                       |

Note: Distances are estimated based on the KlenTaq1 crystal structures of <sup>a</sup>4KTQ, <sup>b</sup>2KTQ, and <sup>c</sup>3KTQ. The reported distance is measured from the alpha carbon of each amino acid to the C5 position of either the <sup>d</sup>9th (dC) or <sup>e</sup>the 10th (dA) base from the primer 3'-end. The distances are not reported here for mutant V256C as no structure of the Full-length Taq Pol in complex with a DNA duplex longer than 8 base pairs is available. The distance for the open ternary complex of V649C is not reported here because the residue is not included in 2KTQ.

<sup>1</sup>Distances do not accurately represent distance between the donor and acceptor fluorophores due to uncertainty in the dye position resulting from the flexibility of the linker between the dye and the attachment site on the protein or DNA

<sup>2</sup>All Taq Pol mutants contain G46D mutation which inactivates the 5'→3' exonuclease activity.

| <b>Table S2.</b> The rates of dTTP incorporation into S-1 DNA <sup>a</sup> by Taq Pol and Klentaq1 mutants obtained from <sup>32</sup> P-based single-turnover experiments at 20 °C. |                            |                 |                                          |                              |                                                             |
|--------------------------------------------------------------------------------------------------------------------------------------------------------------------------------------|----------------------------|-----------------|------------------------------------------|------------------------------|-------------------------------------------------------------|
| <b>Domain</b>                                                                                                                                                                        | <b>Residue<sup>b</sup></b> | <b>Location</b> | <b><math>k_p</math> (s<sup>-1</sup>)</b> | <b><math>K_d</math> (μM)</b> | <b><math>k_p/K_d</math> (μM<sup>-1</sup>s<sup>-1</sup>)</b> |
| <b>Full Length Taq Pol</b>                                                                                                                                                           |                            |                 |                                          |                              |                                                             |
| wt-Taq Pol                                                                                                                                                                           | -                          | -               | 0.105 ± 0.006                            | 48 ± 11                      | 2.19 × 10 <sup>-3</sup>                                     |
| N-terminal                                                                                                                                                                           | V256C                      | Loop            | 0.076 ± 0.004                            | 46 ± 9                       | 1.65 × 10 <sup>-3</sup>                                     |
| Intervening                                                                                                                                                                          | K346C                      | Loop            | 0.104 ± 0.005                            | 94 ± 17                      | 1.11 × 10 <sup>-3</sup>                                     |
|                                                                                                                                                                                      | R411C                      | Helix           | 0.100 ± 0.006                            | 24 ± 18                      | 4.17 × 10 <sup>-3</sup>                                     |
| Thumb                                                                                                                                                                                | E524C                      | Loop            | 0.117 ± 0.004                            | 54 ± 8                       | 2.17 × 10 <sup>-3</sup>                                     |
|                                                                                                                                                                                      | E465C                      | Helix           | 0.101 ± 0.002                            | 57 ± 4                       | 1.77 × 10 <sup>-3</sup>                                     |
| Finger                                                                                                                                                                               | V649C                      | Loop            | 0.076 ± 0.004                            | 82 ± 14                      | 0.93 × 10 <sup>-3</sup>                                     |
|                                                                                                                                                                                      | S644C                      | Helix           | 0.136 ± 0.004                            | 19 ± 3                       | 7.16 × 10 <sup>-3</sup>                                     |
| Palm                                                                                                                                                                                 | A814C                      | Loop            | 0.136 ± 0.004                            | 47 ± 5                       | 2.89 × 10 <sup>-3</sup>                                     |
|                                                                                                                                                                                      | R801C                      | Helix           | 0.096 ± 0.003                            | 45 ± 6                       | 1.56 × 10 <sup>-3</sup>                                     |
| <b>Klentaq1</b>                                                                                                                                                                      |                            |                 |                                          |                              |                                                             |
| wt-Klentaq1                                                                                                                                                                          | -                          | -               | 0.232±0.007                              | 62±7                         | 3.74×10 <sup>-3</sup>                                       |
| Intervening                                                                                                                                                                          | K346C                      | Loop            | 0.33±0.02                                | 62±12                        | 5.32×10 <sup>-3</sup>                                       |
| Finger                                                                                                                                                                               | V649C                      | Loop            | 0.22±0.01                                | 73±11                        | 3.01×10 <sup>-3</sup>                                       |
| Palm                                                                                                                                                                                 | A814C                      | Loop            | 0.27±0.15                                | 60±35                        | 5.67×10 <sup>-3</sup>                                       |
| <sup>a</sup> Experiments were performed using the unlabeled S-1 DNA substrate which contained the modified dT base.                                                                  |                            |                 |                                          |                              |                                                             |
| <sup>b</sup> Mutants are labeled with acceptor fluorophore Alexa594.                                                                                                                 |                            |                 |                                          |                              |                                                             |

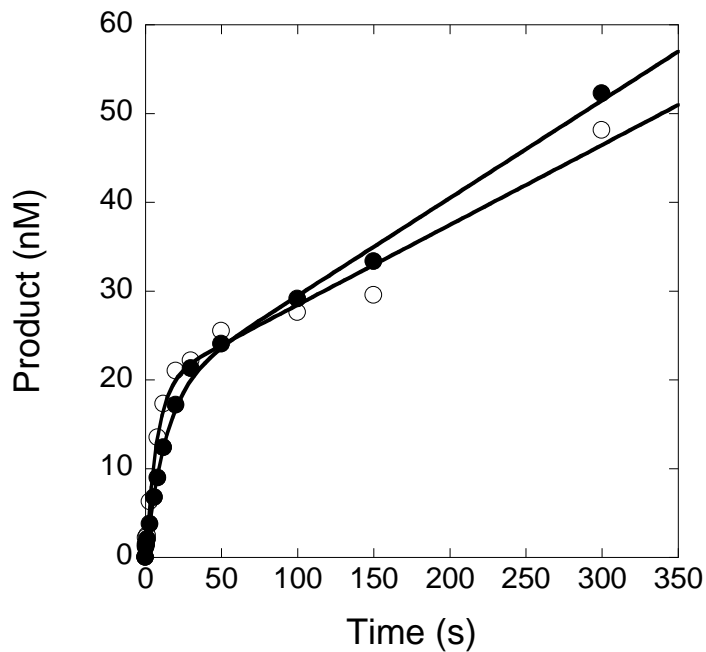

**FIGURE S1.** Burst kinetics of Taq Pol-catalyzed dTTP incorporation into DNA substrates with or without an Alexa488 fluorescent label. A pre-incubated solution of wild-type Taq Pol (30 nM) and  $5'$ - $^{32}\text{P}$ -labeled DNA substrate S-1 (120 nM) either containing (open circles) or lacking (closed circles) the Alexa488 fluorescent label was rapidly mixed with dTTP (500  $\mu\text{M}$ ) and the reaction mixture was quenched at various times with 0.37 M EDTA. The data were fit to a biphasic equation ( $[\text{Product}] = A[1 - \exp(-k_1t) + k_2t]$ ) to yield the following parameters:  $k_1 = 0.065 \pm 0.003 \text{ s}^{-1}$  and  $k_2 = 0.0059 \pm 0.0006 \text{ s}^{-1}$  for the unlabeled DNA substrate and  $k_1 = 0.12 \pm 0.02 \text{ s}^{-1}$  and  $k_2 = 0.0056 \pm 0.0007 \text{ s}^{-1}$  with the Alexa488-labeled DNA substrate.

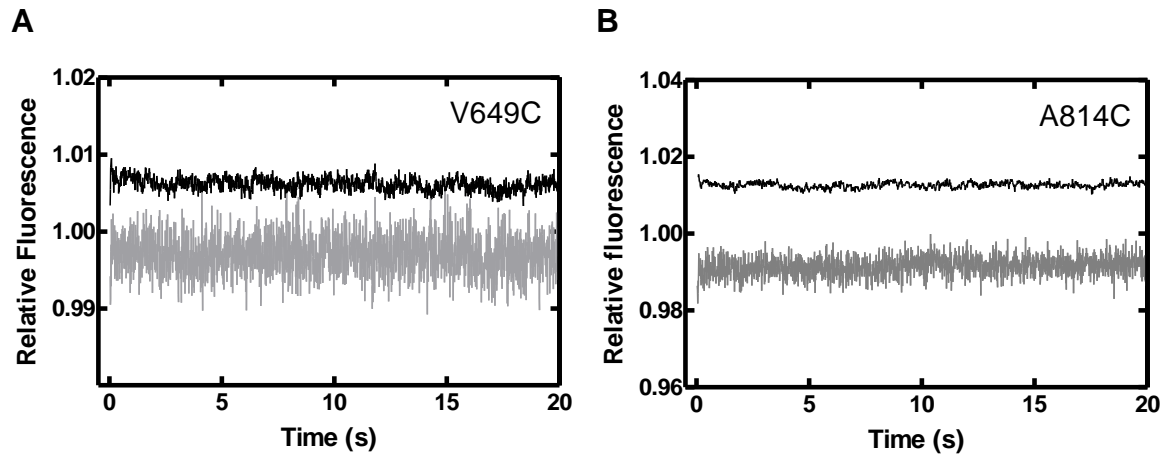

**FIGURE S2.** Stopped-flow control experiments. A solution containing a Taq Pol mutant (200nM) pre-incubated with DNA substrate S-1 (100nM) was rapidly mixed with buffer R and fluorescence was monitored using a stopped-flow apparatus. Representative donor (black) and acceptor (grey) traces are shown for (A) V649C or (B) A814C.

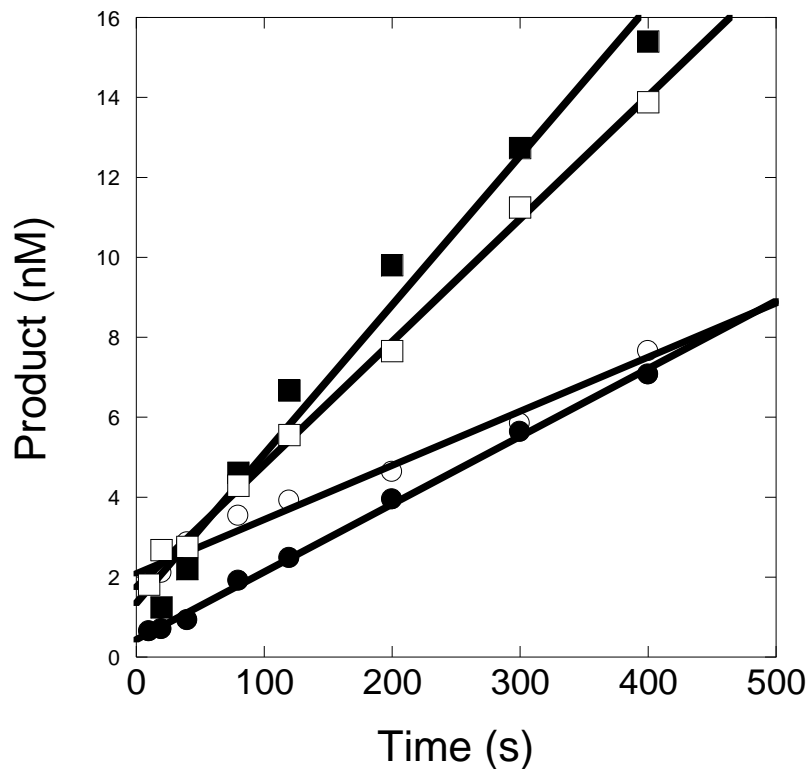

**FIGURE S3.** Steady-state kinetics of dTTP incorporation catalyzed by Taq Pol or Klentaq1. A pre-incubated solution of 1.5 nM wild-type Taq Pol (filled circles), Taq Pol mutant E524C (open circles), wild-type Klentaq1 (filled squares) or Klentaq1 mutant A814C (open squares) and 5'-<sup>32</sup>P-labeled DNA substrate S-1 (250 nM) was rapidly mixed with dTTP (500 μM) and the reaction mixture was quenched at various times with 0.37 M EDTA. The steady-state rate for wild-type Taq Pol, Taq Pol mutant E524C, wild-type Klentaq1, and Klentaq1 mutant A814C were determined to be  $0.011 \pm 0.001 \text{ s}^{-1}$ ,  $0.009 \pm 0.002 \text{ s}^{-1}$ ,  $0.023 \pm 0.002 \text{ s}^{-1}$  and  $0.020 \pm 0.001 \text{ s}^{-1}$  respectively (See Materials and Methods).
